# Supplementary material for: Exploring sources of biogenic secondary organic aerosol compoundsusing chemical analysis and the FLEXPART model
Source: Copernicus journal article supplement (doi:10.5194/acp-2017-90), 2017-02-08
Supplement: Supplementary file 1 [file Data_SI.xlsx]

## Sheet: Concentration of BSOA compounds
All numbers are concentration given in ng/m3.
Date	Adipic acid	Pimelic acid	Suberic acid	Azelaic acid	Pinic acid	Pinonic acid	Terpenylic acid	DTAA	MBTCA	OS 140	OS 154	OS 156	OS 170	OS 200	OS 212	OS 214	OS 216	OS 250	OS 268	OS 280	NOS 295	NOS 297
2012-06-10	0.928718	0.569863	3.83297	17.2283	1.63175	4.30483	2.00166	0.314417	2.60649	0.129742	0.568768	0.245287	0.277224	0.186714	0.516424	0.226856	0.0624813	0.352891	0.092478	0.022045	0.146262	0.0251
2012-06-11	0.537889	0.233157	0.579697	3.31133	1.55063	6.9037	1.47975	0.277241	3.21985	0.0391481	0.371906		0.211125	0.17681	0.348664	0.207072	0.117585	0.284142	0.146292	0.0332137	0.316423	0.0806988
2012-06-12	0.776147	0.22647	0.544857	1.94642	0.563517	2.26359	1.59426	0.271511	2.24114	0.051983	0.324713		0.218795	0.0938702	0.317823	0.148404	0.0590821	0.390331	0.0536579	0.00877902	0.246531	0.0756674
2012-06-13	0.109255	0.0513472			0.899788	2.17477	1.72312	0.288097	2.69351	0.0403149	0.249673	0.158208	0.245517	0.110109	0.321343	0.140153	0.0742457	0.4363	0.0290397	0.00512658	0.0461874	0.013852
2012-06-14	0.298994	0.119808	0.178775	0.810992	3.17783	7.37426	1.78535	0.28342	3.38347	0.0571921	0.417842	0.285876	0.318294	0.18499	0.457329	0.201363	0.118479	0.385346	0.0358081	0.0277328	0.128782	0.0359414
2012-06-15	0.193499	0.0972405		1.16115	0.805373	2.60673	0.982451	0.115332	0.823541	0.0195532	0.234016		0.142515	0.0719515	0.227766	0.113529	0.0760065	0.211472	0.0421515	0.0180238	0.0995893	0.0275772
2012-06-16	0.601026	0.195189	0.637043	2.81114	1.22836	3.95617	1.40406	0.366292	3.7077	0.0491442	0.422387	0.191647	0.348705	0.252873	0.496722	0.25881	0.162973	0.347211	0.0871097	0.0463783	0.177291	0.0427742
2012-06-17	1.15366	0.342113	0.83775	5.97351	2.09348	4.61942	4.58059	1.46471	13.3884	0.114193	1.16993	0.576428	0.406512	0.618587	1.20876	0.571491	0.37407	0.72247	0.420672	0.116426	0.226724	0.104569
2012-06-18	1.2185	0.604609	3.00222	10.4419	0.779629	2.31819	1.52005	0.198171	2.57456	0.0899286	0.363417	0.126891	0.168752	0.124817	0.357605	0.208187	0.201992	0.332084	0.105013	0.025507	0.0770539	0.0486341
2012-06-19	0.903483	0.357744	0.885076	3.36537	1.3401	2.64965	2.77189	1.13842	8.97628	0.143304	0.76795	0.970903	0.365463	0.533393	0.894861	0.531547	0.525797	0.540698	0.28995	0.0781946	0.121104	0.0465194
2012-06-20	0.763341	0.147353	0.596921	1.8472	0.6034	2.45704	1.41621	0.171286	1.67085	0.0643297	0.311024	0.34938	0.319729	0.137361	0.417801	0.253497	0.213219	0.337698	0.0267073	0.00969106	0.066511	0.0167732
2012-06-21	1.30065	0.405534	1.43449	2.61222	0.912092	2.79105	1.85637	0.253313	2.8601	0.0871136	0.39555	0.906328	0.327859	0.302883	0.555082	0.325564	0.471748	0.379465	0.0576178	0.00887579	0.0295652	0.0159218
2012-06-22
2012-06-23	1.21338	0.385753	0.959999	2.94055	4.71103	10.6551	5.62089	1.91055	14.8169	0.121193	1.05144	0.975404	0.366709	0.481668	1.4387	0.968941	1.12251	1.17766	0.358316	0.136102	0.375323	0.0996527
2012-06-24	0.652201	0.22739	0.409846	1.76014	1.18199	3.08785	2.37866	0.231909	2.06221	0.103399	0.546693	0.196108	0.355804	0.1597	0.540452	0.259101	0.0627007	0.492804	0.122752	0.0187511	0.0382875
2012-06-25	1.84367	0.476877	2.08923	6.46323	1.08769	2.16343	1.87588	0.323918	3.77147	0.181772	0.691646	0.317601	0.617507	0.490277	0.801023	0.38939	0.214583	0.814478	0.119305	0.0420338	0.127169	0.0580913
2012-06-26	1.7774	0.457774	2.80015	13.6268	0.869027	1.61766	1.43838	0.255422	1.26988	0.211106	0.359859	0.0206597	0.186012	0.103744	0.300417	0.139934	0.147299	0.0214058	0.0310957		0.0996812	0.0226633
2012-06-27	19.2727	0.290314	0.630761	1.0855	0.742715	2.37403	1.83003	0.815002	5.57815	0.053825	0.46961	0.136694	0.297811	0.211084	0.605832	0.433004	0.573975	0.489263	0.0854282	0.0427721	0.0559294	0.0189901
2012-06-28	0.583068	0.0377585		0.200755	0.285376	0.987598	0.880706	0.182531	1.86157	0.0216057	0.198231		0.150001	0.130786	0.292313	0.180598	0.240394	0.239136	0.0470955	0.00787584	0.0507882	0.0146126
2012-06-29	0.617049	0.134152	0.0851835	0.407298	0.999584	1.96243	2.6394	0.564324	5.6827	0.063769	0.604611	0.447904	0.27002	0.303786	0.620641	0.37827	0.288529	0.85258	0.149259	0.0273173	0.0902316	0.0383944
2012-06-30	0.88166	0.27129	0.713592	3.28718	1.98906	2.09984	6.74105	3.06104	29.4183	0.242389	2.13769	1.58187	0.78292	1.0144	2.26548	1.0549	0.797204	1.19461	0.475988	0.670471	0.531766	0.181212
2012-07-01	0.660307	0.175988	0.214311	1.37708	1.2218	2.31925	2.74855	0.639559	6.02758	0.223327	1.15878	1.40888	0.595307	0.831136	1.33246	0.737744	0.6059	3.47805	0.230393	0.0456797	0.11975	0.0695648
2012-07-02	0.933325	0.580332	4.58555	36.4745	1.77944	3.91655	2.8274	0.815587	7.88296	0.210074	1.16079	1.19882	0.531482	0.707365	1.51918	0.767422	0.718416	0.318857	0.182345	0.0696792	0.269307	0.0984709
2012-07-03	0.576012	0.424219	2.19691	9.33067	0.633557	1.57175	1.42168	0.152054	2.11732	0.101256	0.594395	0.249954	0.3104	0.343676	0.567525	0.34375	0.343027	0.164952	0.0451772	0.0166626	0.061918	0.0410272
2012-07-04	0.923877	0.46457	3.23082	14.4825	1.28454	2.98271	1.79481	0.494547	5.45506	0.126038	0.841012	0.710778	0.392339	0.531977	0.993491	0.544796	0.887659	0.21717	0.0605034	0.0339088	0.0399916	0.0250315
2012-07-05	1.14029	0.588271	4.2708	30.5253	3.24221	5.45627	5.69694	2.06239	12.3985	0.148749	1.31143	1.31278	0.432086	0.661288	1.5852	0.8586	1.35615	1.23048	0.0653877	0.10938	0.134875	0.0524338
2012-07-06	15.2819	0.722293	4.08016	16.0547	4.3347	4.64306	8.85785	4.67749	26.4796	0.242052	2.95395	2.3398	0.719885	1.58401	4.15181	2.2357	3.78413	1.78645	0.385273	0.7035	0.193211	0.0891461
2012-07-07	1.49347	0.659891	4.7051	34.3467	2.35296	1.5807	5.8494	5.67242	22.2929	0.279951	2.69262	2.35236	0.705811	2.01986	4.62772	3.0821	5.83171	0.758638	0.300633	0.362673	0.0906453	0.0843178
2012-07-08	1.2175	0.620626	4.67233	39.0666	1.23037	2.12542	4.34694	1.85539	9.66247	0.156069	1.00271	0.59204	0.31857	0.514022	1.31817	0.606535	0.413409	0.822088	0.124797	0.0369078	0.0220562	0.0242662
2012-07-09	1.14718	0.671207	5.42263	24.1714	1.05444	2.49184	3.42842	0.374162	3.38108	0.163643	0.79964	0.78516	0.401503	0.377481	0.901277	0.409264	0.43465	0.0910344	0.0308011	0.0172636	0.0506935	0.0254365
2012-07-10	1.67441	1.20931	8.85705	55.2662	1.19271	2.68065	3.3908	0.815205	6.89027	0.144983	1.06822	0.655925	0.363816	0.496179	1.07735	0.475864	0.374772	0.0713727	0.141649	0.127694	0.114979	0.0826065
2012-07-11	0.929625	0.962058	9.03086		0.284289	1.2534	0.957446	0.0698321	0.384147	0.0297118	0.15321		0.077823	0.0623917	0.159706	0.059367	0.0749863	0.0173809	0.00994705		0.0194249	0.0215949
2012-07-12	0.941903	0.762204	3.87159	21.953	0.874762	1.59066	2.1972	0.306944	3.26676	0.12753	0.759092	0.326873	0.328254	0.29679	0.669009	0.327545	0.15595	0.0517397	0.130263	0.0282781	0.0546016	0.0443116
2012-07-13	0.0307161	0.0251398		1.11755	0.413218	1.28427	1.11757	0.109499	1.15326	0.0778605	0.386349	0.15242	0.190114	0.143198	0.325977	0.217483	0.204338	0.0338626	0.0359852		0.0308631	0.0312563
2012-07-14	0.328202		0.0499192	0.52659	0.390028	1.44028	1.02784	0.1794	2.58285	0.0884673	0.502268	0.565387	0.225916	0.342123	0.537059	0.320652	0.312684	0.0508862	0.0634421	0.0296251	0.0427186	0.0412354
2012-07-15	0.362492	0.0189647		0.471841	1.32753	2.43298	2.97496	1.03887	9.9298	0.176738	1.10689	0.485869	0.339944	0.504277	0.91828	0.442296	0.318544	0.322691	0.211273	0.0933343	0.134184	0.076414
2012-07-16					0.382286	1.16068	0.956111	0.076838	0.971681	0.0240767	0.250476		0.0923559	0.12264	0.268167	0.164573	0.477718	0.0420796	0.0161747		0.0286556	0.0240351
2012-07-17		0.0246944		0.0284159	0.304202	0.882194	0.720347	0.0382067	0.517376	0.0164581	0.1714	0.0195299	0.0967121	0.172642	0.289687	0.213889	0.981133	0.0280581	0.0170275		0.0299013	0.0243736
2012-07-18	0.149997	0.198336	0.761196	1.89921	0.297443	0.822611	0.818303	0.0405731	0.819057	0.0562121	0.27679	0.122445	0.173415	0.196885	0.347707	0.310064	0.72783	0.0158537	0.0163762		0.0318956	0.024195

## Sheet: PM2.5
Date	PM2.5 (µg/m3)
2012-06-10	9.12812
2012-06-11	8.10769
2012-06-12	10.4875
2012-06-13	12.6708
2012-06-14	11.075
2012-06-15	12.825
2012-06-16	15.571
2012-06-17	15.2875
2012-06-18	16.408
2012-06-19	12.341
2012-06-20	12.275
2012-06-21	13.225
2012-06-22	12.995
2012-06-23	15.783
2012-06-24	17.4458
2012-06-25	4.141
2012-06-26	11.08
2012-06-27	6.991
2012-06-28	8.2
2012-06-29	18.966
2012-06-30	19.7625
2012-07-01	20.121
2012-07-02	15.885
2012-07-03	13.175
2012-07-04	11.316
2012-07-05	16.366
2012-07-06	18.762
2012-07-07	16.395
2012-07-08	18.608
2012-07-09	14.962
2012-07-10	10.566
2012-07-11	15.216
2012-07-12	11.604
2012-07-13	8.479
2012-07-14	1.4535
2012-07-15	0.9505
2012-07-16	7.866
2012-07-17	7.366
2012-07-18	7.9083

## Sheet: FLEXPART footprints
FLEXPART exposure (arbitrary units)
Date	Pastures	Discontinuous urban fabric	Non-irrigated arable land	Sparsely vegetated areas	Broad-leaved forest	Lakes and ponds	Moors and heathland	Coniferous forest	Sea and Ocean	Other
2012-06-10	391.433	215.359	891.475	0.165314	70.4255	19.6343	7.41769	85.1543	836.527	413.916
2012-06-11	359.425	169.297	907.671	37.8394	75.0362	42.0109	47.1012	106.65	5936.63	384.518
2012-06-12	94.5955	167.431	1569.26	260.568	213.798	111.24	289.343	520.146	10561.3	751.345
2012-06-13	95.2143	142.188	1671.25	48.721	292.825	31.6625	59.2398	483.821	5343.93	461.815
2012-06-14	129.836	187.461	1555.26	69.1753	307.728	104.028	64.86	1238.91	5588.34	816.985
2012-06-15	11.0348	85.8355	660.125	0.47182	33.2282	29.5788	9.39965	54.3384	4459.54	296.592
2012-06-16	373.484	202.549	1577.45	0.530313	162.205	66.7727	12.174	415.675	4925.94	515.066
2012-06-17	901.306	561.374	3277.82	0.282599	540.376	57.9369	14.9057	477.354	2630.09	1032.43
2012-06-18	386.466	237.628	1248.48	0.109257	71.8789	62.2684	8.08813	34.3593	1688.65	591.117
2012-06-19	119.347	174.66	1198.62	0.00978846	57.5013	24.8148	18.9906	42.9487	4585.15	472.421
2012-06-20	119.347	174.66	1198.62	0.00978846	57.5013	24.8148	18.9906	42.9487	4585.15	472.421
2012-06-21	71.554	113.698	955.584	3.11667	93.9933	31.0852	14.2961	266.472	4376.5	323.237
2012-06-22	140.76	97.1518	754.326	53.3327	366.281	223.941	46.0249	1910.62	4702.91	702.297
2012-06-23	409.878	192.044	1622.67	68.9518	417.093	151.977	89.8289	1126.64	5969.43	1780.17
2012-06-24	421.873	305.193	1418.08	0.0452935	93.8656	47.3286	7.47653	51.2428	1567.09	656.733
2012-06-25	850.337	352.463	2602.66	0.270179	354.921	115.82	19.5999	613.972	3214.51	807.455
2012-06-26	238.304	150.68	1246.58	7.58073	93.1755	304.518	16.2542	1731.68	4690.67	715.966
2012-06-27	31.0317	51.7631	521.967	249.009	149.075	142.223	226.589	857.531	4361.19	603.393
2012-06-28	18.7897	51.1368	522.874	177.16	108.371	61.7772	153.23	410.212	4908.64	387.447
2012-06-29	33.8487	137.335	1253.62	281.548	197.325	94.5142	206.907	723.322	5692.69	761.713
2012-06-30	1115.58	476.455	4524.79	1.97285	540.609	159.462	25.2383	1527.03	6324.02	1174.55
2012-07-01	584.79	270.536	1637.84	0.249699	147.483	74.3385	9.02434	94.454	4388.92	683.716
2012-07-02	702.01	307.967	2152	0.612014	277.556	62.7108	14.2061	333.508	3159.06	793.974
2012-07-03	466.246	233.442	1289.07	0.0233974	81.0068	44.3487	6.00231	48.8684	2398.73	488.49
2012-07-04	533.1	209.267	1841.49	0.122361	409.724	116.742	5.98158	275.132	3982.85	402.857
2012-07-05	291.942	120.314	1169.02	15.2122	428.417	126.794	3.84079	1169.5	5363.12	762.294
2012-07-06	418.663	141.809	1301.67	17.7977	595.383	257.273	13.9312	2170.35	7569.32	1858.07
2012-07-07	1022.72	421.784	4782.58	13.5597	912.73	197.095	5.81178	2122.17	8413.5	3225.06
2012-07-08	1394.22	818.158	6292.51	3.81395	978.325	163.723	20.8443	1287.36	10450.7	2701.38
2012-07-09	1005.28	517.891	4242.51	1.1834	646.383	119.004	30.3683	699.507	9426.61	1415.1
2012-07-10	789.238	354.455	2234.05	45.0766	448.506	62.0851	54.4096	419.627	8155.62	840.187
2012-07-11	24.4369	123.426	792.48	131.154	101.41	33.806	104.853	99.1847	9350.13	467.936
2012-07-12	678.573	446.187	2250.45	0.477608	146.546	64.9889	14.6333	100.574	4507.95	876.039
2012-07-13	308.369	183.867	1274.86	0.111332	49.5094	31.6708	15.8615	33.7763	7313.51	494.224
2012-07-14	352.557	187.976	1285.56	0.157351	165.327	36.2412	12.9398	232.946	2281.36	382.14
2012-07-15	1126.51	621.884	4010.84	0.568661	862.194	62.8813	23.0674	789.953	2787.76	1061.77
2012-07-16	9.79629	29.2203	394.621	0.00563001	8.67443	10.8615	8.77049	42.6181	4041.65	162.215
2012-07-17	16.1323	52.6065	490.613	0.0654309	20.219	17.8637	12.1024	39.2861	3314	221.461
2012-07-18	14.7705	34.0148	447.733	0.0158102	11.5872	11.1458	8.3781	40.0536	2970.36	176.703
