# Supplementary material for: Exploring sources of biogenic secondary organic aerosol compoundsusing chemical analysis and the FLEXPART model
Source: Copernicus journal article supplement (doi:10.5194/acp-2017-90), 2017-02-08
Supplement: Supplementary file 2 [file acp-2017-90-supplement.zip]

Archive with 2 entries (2 files):
- Data_SI.xlsx
- Martinsson et al. 2017_Supplemental Information.pdf
